# Supplementary material for: A meta analysis of genome-wide association studies for limb bone lengths in four pig populations
Source: PubMed Central journal article supplement (PMC4518597; doi:10.1186/s12863-015-0257-1), 2015-07-29
Supplement: 12863_2015_257_MOESM1_ESM.pdf [file 12863_2015_257_MOESM1_ESM.pdf]

**Additional File 1** The phenotypic correlation coefficients between the lengths of limb bones

|                | Humerus | Ulna  | Femur | Tibia |
|----------------|---------|-------|-------|-------|
| Erhualian      |         |       |       |       |
| Scapula        | 0.877   | 0.874 | 0.788 | 0.872 |
| Humerus        |         | 0.884 | 0.825 | 0.905 |
| Ulna           |         |       | 0.832 | 0.939 |
| Femur          |         |       |       | 0.846 |
| F <sub>2</sub> |         |       |       |       |
| Scapula        | 0.831   | 0.858 | 0.887 | 0.838 |
| Humerus        |         | 0.899 | 0.886 | 0.814 |
| Ulna           |         |       | 0.906 | 0.869 |
| Femur          |         |       |       | 0.888 |
| Laiwu          |         |       |       |       |
| Scapula        | 0.688   | 0.771 | 0.826 | 0.813 |
| Humerus        |         | 0.801 | 0.799 | 0.763 |
| Ulna           |         |       | 0.859 | 0.865 |
| Femur          |         |       |       | 0.908 |
| Sutai          |         |       |       |       |
| Scapula        | 0.873   | 0.854 | 0.924 | 0.882 |
| Humerus        |         | 0.870 | 0.895 | 0.888 |
| Ulna           |         |       | 0.901 | 0.912 |
| Femur          |         |       |       | 0.941 |
| ALL            |         |       |       |       |
| Scapula        | 0.845   | 0.875 | 0.870 | 0.832 |
| Humerus        |         | 0.897 | 0.887 | 0.854 |
| Ulna           |         |       | 0.894 | 0.889 |
| Femur          |         |       |       | 0.901 |

All of the phenotypic correlation coefficients are significant with  $P < 0.0001$ .
