# Supplementary material for: A meta analysis of genome-wide association studies for limb bone lengths in four pig populations
Source: PubMed Central journal article supplement (PMC4518597; doi:10.1186/s12863-015-0257-1), 2015-07-29
Supplement: 12863_2015_257_MOESM2_ESM.pdf [file 12863_2015_257_MOESM2_ESM.pdf]

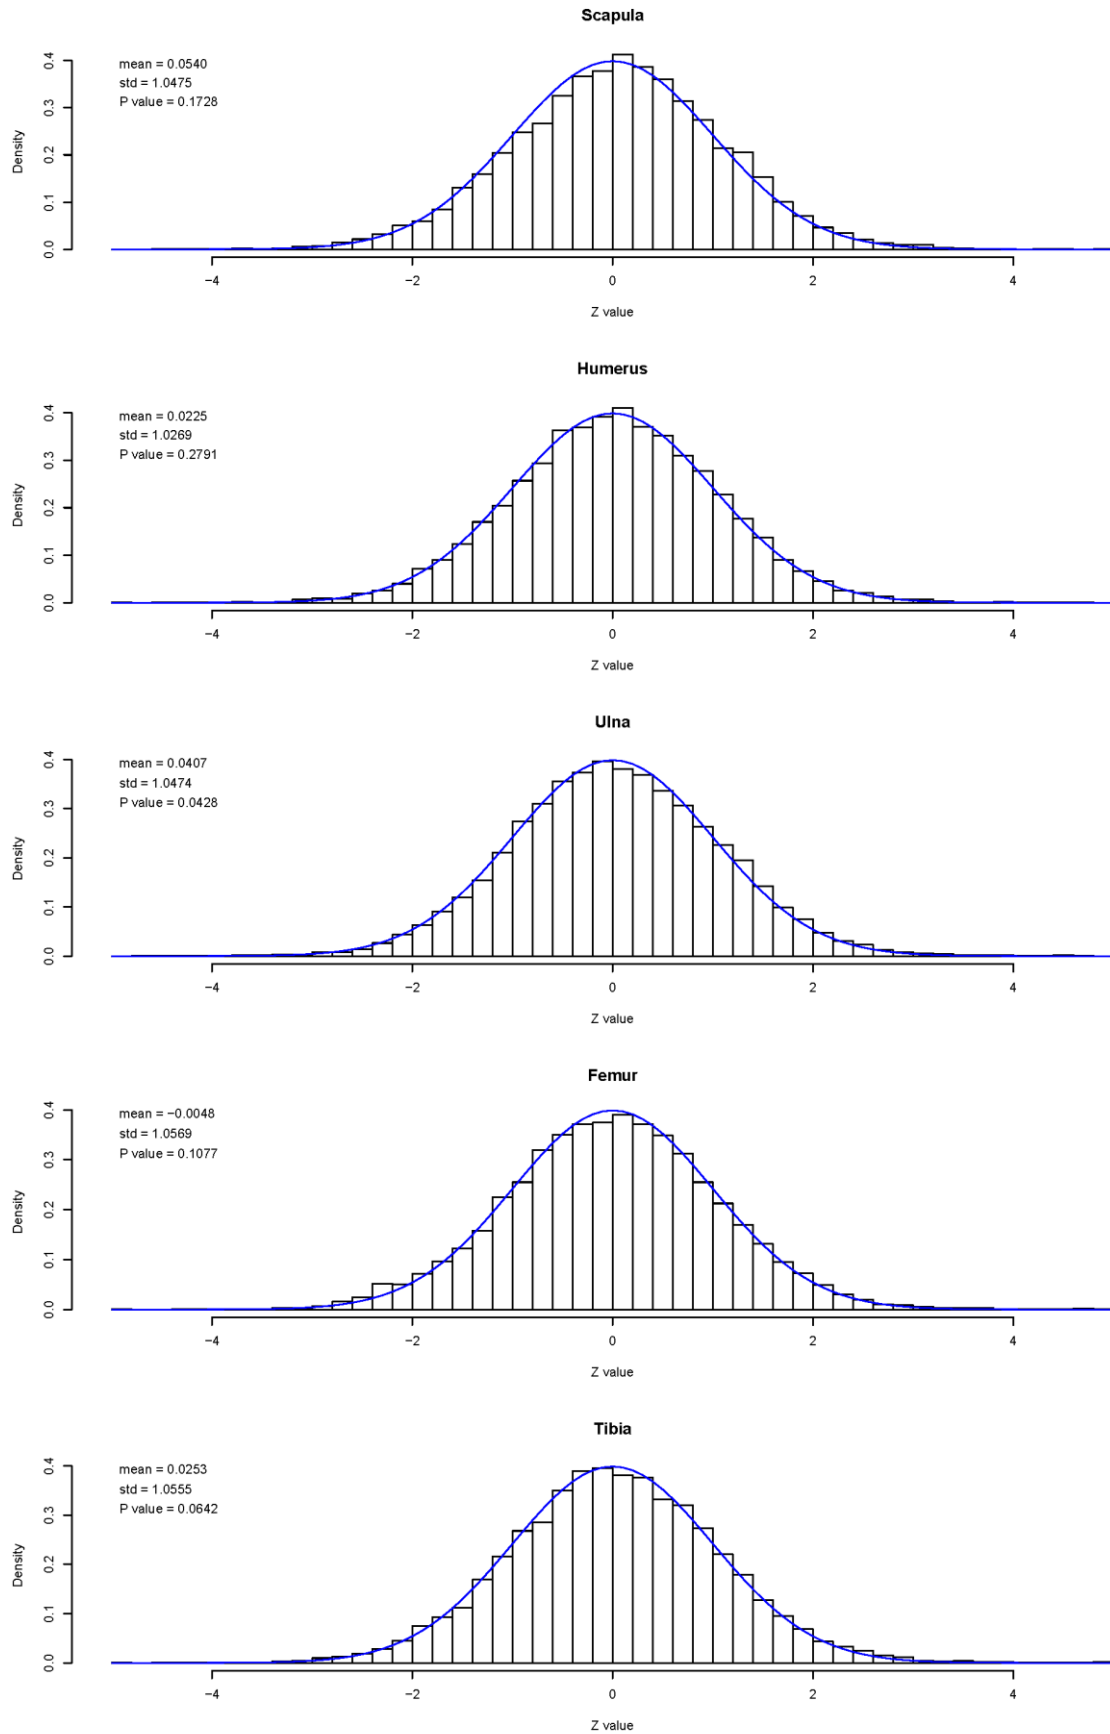

**Additional File 2** The distribution of the statistic (Z value) using in the GWAS meta analysis. The blue curve is the probability density of the standard normal distribution, and the *P* value is obtained from a Kolmogorov-Smirnov test.
