# Supplementary material for: A meta analysis of genome-wide association studies for limb bone lengths in four pig populations
Source: PubMed Central journal article supplement (PMC4518597; doi:10.1186/s12863-015-0257-1), 2015-07-29
Supplement: 12863_2015_257_MOESM3_ESM.pdf [file 12863_2015_257_MOESM3_ESM.pdf]

**Additional File 3** The numbers of animals and SNPs passed through the quality

control

| Population     | Animals | Mapped SNPs | Unmapped SNPs | Adjacent SNPs' interval, kb |         |         |
|----------------|---------|-------------|---------------|-----------------------------|---------|---------|
|                |         |             |               | Minimum                     | Average | Maximum |
| F <sub>2</sub> | 925     | 34636       | 4825          | 0                           | 74.7    | 33542.4 |
| Erhualian      | 331     | 24602       | 3492          | 0                           | 105.1   | 37786.4 |
| Laiwu          | 314     | 32058       | 4527          | 0                           | 80.7    | 37786.4 |
| Sutai          | 434     | 36341       | 4979          | 0                           | 71.2    | 3755.8  |
| Meta           | 2004    | 13595       | 1834          | 0                           | 189.9   | 38806.1 |
