# Supplementary material for: A meta analysis of genome-wide association studies for limb bone lengths in four pig populations
Source: PubMed Central journal article supplement (PMC4518597; doi:10.1186/s12863-015-0257-1), 2015-07-29
Supplement: 12863_2015_257_MOESM5_ESM.pdf [file 12863_2015_257_MOESM5_ESM.pdf]

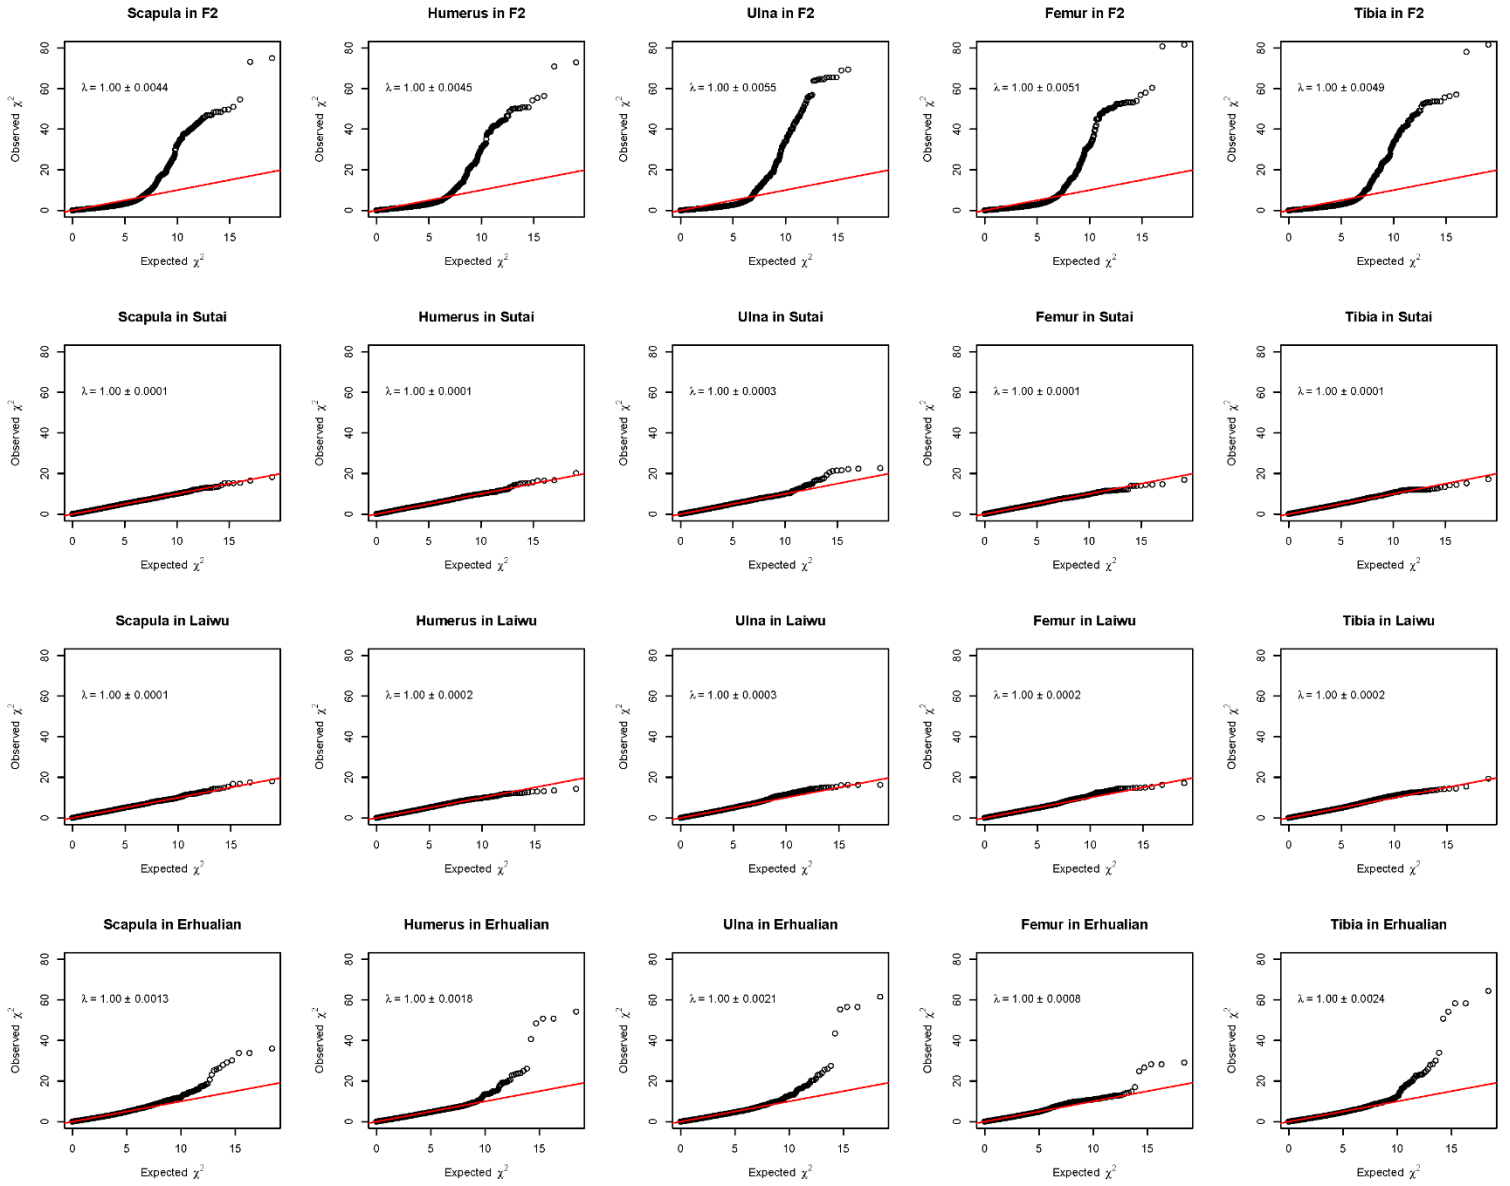

**Additional File 5** The quantile-quantile (QQ) plot for the limb bone lengths in the four populations. X and y axes are the expected and observed values of association test statistics (chi-square), respectively. The estimated lambda ( $\lambda$ ) and its standard error is showing in the figure.
