# Supplementary material for: A meta analysis of genome-wide association studies for limb bone lengths in four pig populations
Source: PubMed Central journal article supplement (PMC4518597; doi:10.1186/s12863-015-0257-1), 2015-07-29
Supplement: 12863_2015_257_MOESM6_ESM.pdf [file 12863_2015_257_MOESM6_ESM.pdf]

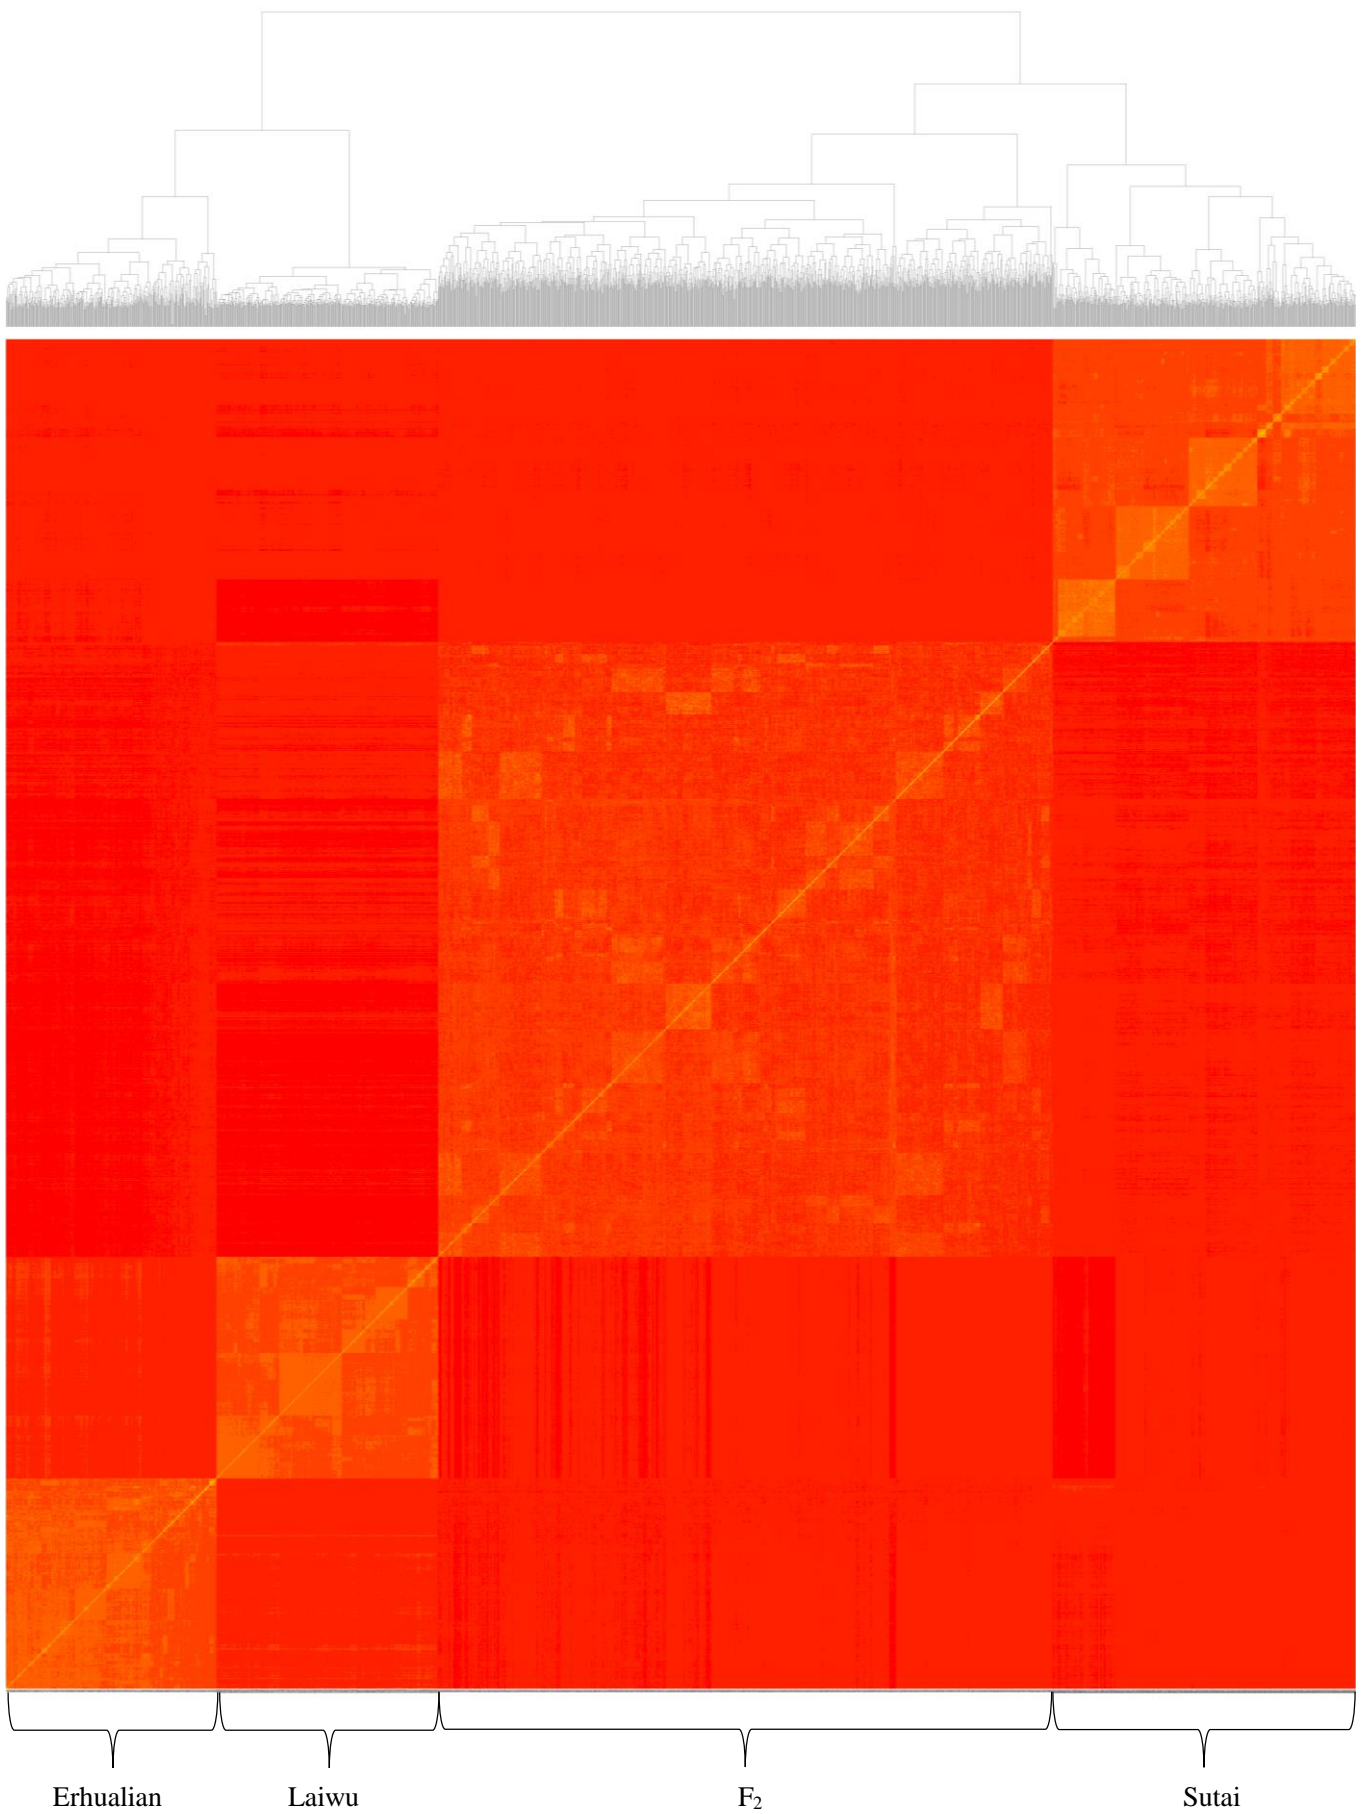

**Additional File 6** A phylogenetic tree of the individuals were constructed according to their genetic distances. The clustering results completely agreed with the populations without exception.
