# Supplementary material for: A meta analysis of genome-wide association studies for limb bone lengths in four pig populations
Source: PubMed Central journal article supplement (PMC4518597; doi:10.1186/s12863-015-0257-1), 2015-07-29
Supplement: 12863_2015_257_MOESM8_ESM.pdf [file 12863_2015_257_MOESM8_ESM.pdf]

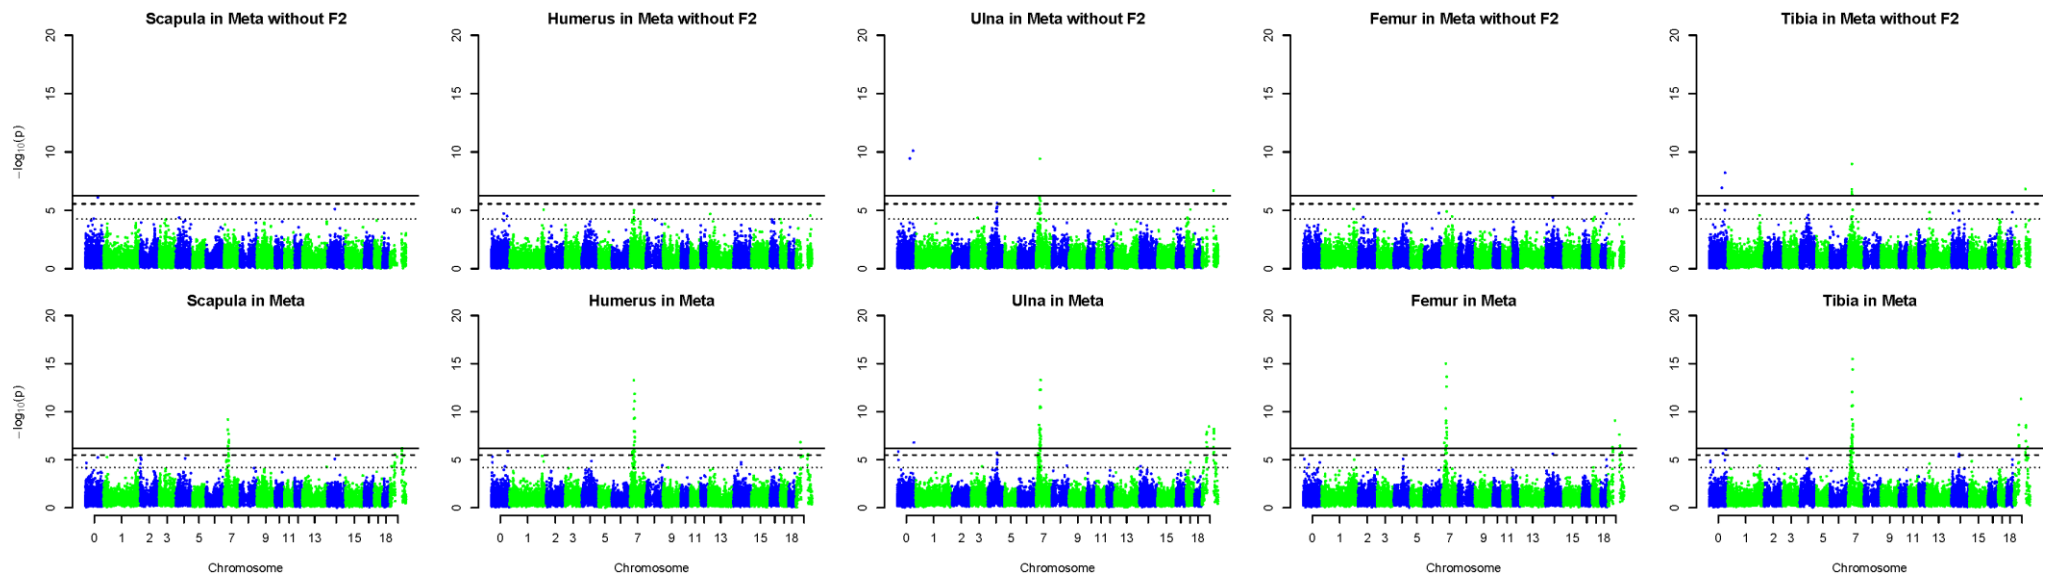

**Additional File 8** The Manhattan plot of the GWAS meta analysis. Above. across the 3 pure breeds; Bottom. across the four populations. The dashed and dotted horizontal lines indicate the 5% genome-wide and suggestive significant threshold values, respectively.
