# Supplementary material for: A meta analysis of genome-wide association studies for limb bone lengths in four pig populations
Source: PubMed Central journal article supplement (PMC4518597; doi:10.1186/s12863-015-0257-1), 2015-07-29
Supplement: 12863_2015_257_MOESM9_ESM.pdf [file 12863_2015_257_MOESM9_ESM.pdf]

**Additional File 9** The chromosomal regions associated with the limb bone lengths under the assumption of the linkage phases being same in the four populations

| Trait   | Chr <sup>1</sup> | Top SNP     | Position, Mb | Effect $\pm$ SE    | <i>P</i> Value <sup>2</sup>      | <i>N</i> <sub>SNP</sub> <sup>3</sup> |
|---------|------------------|-------------|--------------|--------------------|----------------------------------|--------------------------------------|
| Scapula | 1                | ss131149408 | 282.04       | -0.164 $\pm$ 0.039 | 2.43 $\times$ 10 <sup>05</sup>   | 1                                    |
| Scapula | 2                | ss131211507 | 3.61         | -0.139 $\pm$ 0.033 | 2.70 $\times$ 10 <sup>05</sup>   | 1                                    |
| Ulna    | 4                | ss131269439 | 81.71        | 0.195 $\pm$ 0.041  | 1.93 $\times$ 10 <sup>06*</sup>  | 1                                    |
| Femur   | 4                | ss131270306 | 84.98        | 0.163 $\pm$ 0.040  | 4.72 $\times$ 10 <sup>05</sup>   | 1                                    |
| Humerus | 4                | ss131270306 | 84.98        | 0.164 $\pm$ 0.038  | 1.41 $\times$ 10 <sup>05</sup>   | 1                                    |
| Femur   | 7                | ss131342596 | 33.18        | -0.232 $\pm$ 0.037 | 5.46 $\times$ 10 <sup>10**</sup> | 3                                    |
| Scapula | 7                | ss131342596 | 33.18        | -0.194 $\pm$ 0.040 | 9.93 $\times$ 10 <sup>07*</sup>  | 1                                    |
| Humerus | 7                | ss131347175 | 40.85        | -0.190 $\pm$ 0.034 | 2.40 $\times$ 10 <sup>08**</sup> | 4                                    |
| Tibia   | 7                | ss131347175 | 40.85        | -0.224 $\pm$ 0.034 | 7.51 $\times$ 10 <sup>11**</sup> | 6                                    |
| Ulna    | 7                | ss131347175 | 40.85        | -0.233 $\pm$ 0.038 | 6.90 $\times$ 10 <sup>10**</sup> | 8                                    |
| Humerus | 8                | ss131065181 | 145.99       | -0.131 $\pm$ 0.032 | 3.86 $\times$ 10 <sup>05</sup>   | 1                                    |
| Ulna    | 17               | ss131546319 | 37.50        | 0.180 $\pm$ 0.045  | 6.46 $\times$ 10 <sup>05</sup>   | 1                                    |
| Tibia   | 18               | ss107862415 | 52.79        | 0.143 $\pm$ 0.035  | 3.39 $\times$ 10 <sup>05</sup>   | 1                                    |
| Humerus | X                | ss478943984 | 45.12        | 0.083 $\pm$ 0.019  | 7.59 $\times$ 10 <sup>06</sup>   | 4                                    |
| Femur   | X                | ss23131102  | 63.65        | -0.133 $\pm$ 0.022 | 8.67 $\times$ 10 <sup>10**</sup> | 3                                    |
| Tibia   | X                | ss23131102  | 63.65        | -0.140 $\pm$ 0.020 | 4.67 $\times$ 10 <sup>12**</sup> | 2                                    |
| Ulna    | X                | ss23131102  | 63.65        | -0.129 $\pm$ 0.022 | 3.55 $\times$ 10 <sup>09**</sup> | 2                                    |
| Scapula | X                | ss131070541 | 106.48       | 0.123 $\pm$ 0.026  | 2.72 $\times$ 10 <sup>06*</sup>  | 2                                    |

Notes: 1. Chromosome; 2. The *P* value was corrected by genomic control. \*\*: 1% genome-wide significant; \*: 5% genome-wide significant; without \*: suggestive significant; 3. number of SNPs that surpass the suggestive significance level.
