# Supplementary material for: A meta analysis of genome-wide association studies for limb bone lengths in four pig populations
Source: PubMed Central journal article supplement (PMC4518597; doi:10.1186/s12863-015-0257-1), 2015-07-29
Supplement: 12863_2015_257_MOESM10_ESM.pdf [file 12863_2015_257_MOESM10_ESM.pdf]

**Additional File 10** The chromosomal regions with  $P$  values  $\leq 0.001$  after genomic control

| Chr <sup>1</sup> | Trait   | Population | Top SNP     | Position, Mb | Effect $\pm$ S.E. | $P$ Value <sup>2</sup> | $N_{\text{SNP}}$ <sup>3</sup> |
|------------------|---------|------------|-------------|--------------|-------------------|------------------------|-------------------------------|
| 1                | Humerus | Laiwu      | ss120022060 | 33.49        | 0.294 $\pm$ 0.077 | 2.45 $\times 10^{-4}$  | 6                             |
| 1                | Ulna    | Meta       | ss131133913 | 176.13       | 0.129 $\pm$ 0.035 | 2.30 $\times 10^{-4}$  | 8                             |
| 1                | Ulna    | Sutai      | ss107801243 | 248.80       | 0.263 $\pm$ 0.072 | 4.48 $\times 10^{-4}$  | 4                             |
| 1                | Ulna    | Laiwu      | ss107826847 | 280.64       | 0.256 $\pm$ 0.069 | 6.64 $\times 10^{-4}$  | 1                             |
| 1                | Humerus | Sutai      | ss131155630 | 297.46       | 0.162 $\pm$ 0.046 | 5.89 $\times 10^{-4}$  | 2                             |
| 1                | Femur   | Laiwu      | ss107831074 | 303.97       | 0.229 $\pm$ 0.058 | 3.24 $\times 10^{-4}$  | 4                             |
| 1                | Scapula | Erhualian  | ss131038377 | 309.79       | 0.461 $\pm$ 0.125 | 6.53 $\times 10^{-4}$  | 1                             |
| 2                | Femur   | Sutai      | ss107824650 | 28.25        | 0.217 $\pm$ 0.056 | 1.94 $\times 10^{-4}$  | 2                             |
| 2                | Humerus | Meta       | ss131103405 | 44.81        | 0.117 $\pm$ 0.031 | 1.56 $\times 10^{-4}$  | 4                             |
| 2                | Femur   | Laiwu      | ss107845729 | 46.27        | 0.472 $\pm$ 0.130 | 9.07 $\times 10^{-4}$  | 2                             |
| 2                | Humerus | Sutai      | ss131189210 | 50.64        | 0.175 $\pm$ 0.052 | 9.39 $\times 10^{-4}$  | 1                             |
| 2                | Tibia   | Meta       | ss131564921 | 127.15       | 0.136 $\pm$ 0.035 | 8.72 $\times 10^{-5}$  | 4                             |
| 2                | Scapula | Laiwu      | ss131201108 | 128.42       | 0.404 $\pm$ 0.110 | 3.16 $\times 10^{-4}$  | 4                             |
| 2                | Femur   | Meta       | ss131208474 | 154.33       | 0.155 $\pm$ 0.040 | 1.11 $\times 10^{-4}$  | 7                             |
| 3                | Femur   | Meta       | ss131231647 | 5.61         | 0.118 $\pm$ 0.032 | 2.03 $\times 10^{-4}$  | 3                             |
| 3                | Femur   | Sutai      | ss131215509 | 9.48         | 0.291 $\pm$ 0.083 | 7.30 $\times 10^{-4}$  | 1                             |
| 3                | Tibia   | Meta       | ss131222267 | 13.56        | 0.146 $\pm$ 0.040 | 2.94 $\times 10^{-4}$  | 6                             |
| 3                | Tibia   | Sutai      | ss131222267 | 13.56        | 0.354 $\pm$ 0.082 | 3.41 $\times 10^{-5}$  | 3                             |
| 3                | Humerus | Meta       | ss107841158 | 32.73        | 0.150 $\pm$ 0.038 | 7.93 $\times 10^{-5}$  | 9                             |
| 3                | Scapula | Meta       | ss131217224 | 60.95        | 0.144 $\pm$ 0.037 | 8.79 $\times 10^{-5}$  | 16                            |
| 3                | Scapula | Laiwu      | ss131217606 | 62.56        | 0.274 $\pm$ 0.070 | 1.16 $\times 10^{-4}$  | 16                            |
| 4                | Femur   | Sutai      | ss131249064 | 14.59        | 0.479 $\pm$ 0.137 | 8.05 $\times 10^{-4}$  | 1                             |
| 4                | Tibia   | Erhualian  | ss478940911 | 65.72        | 0.477 $\pm$ 0.105 | 3.67 $\times 10^{-5}$  | 2                             |
| 4                | Femur   | Laiwu      | ss478944380 | 77.03        | 0.332 $\pm$ 0.073 | 3.56 $\times 10^{-5}$  | 39                            |
| 4                | Tibia   | Laiwu      | ss478944380 | 77.03        | 0.297 $\pm$ 0.068 | 8.61 $\times 10^{-5}$  | 37                            |
| 4                | Humerus | Laiwu      | ss131267615 | 77.19        | 0.303 $\pm$ 0.086 | 6.52 $\times 10^{-4}$  | 2                             |
| 4                | Ulna    | Laiwu      | ss478940989 | 77.58        | 0.355 $\pm$ 0.081 | 5.51 $\times 10^{-5}$  | 59                            |
| 4                | Scapula | Sutai      | ss131245760 | 132.73       | 0.265 $\pm$ 0.068 | 1.70 $\times 10^{-4}$  | 3                             |

|   |         |           |             |        |             |                       |    |
|---|---------|-----------|-------------|--------|-------------|-----------------------|----|
| 5 | Femur   | Laiwu     | ss131288413 | 6.80   | 0.427±0.111 | 4.18×10 <sup>-4</sup> | 3  |
| 5 | Tibia   | Laiwu     | ss131288413 | 6.80   | 0.371±0.099 | 7.22×10 <sup>-4</sup> | 1  |
| 5 | Humerus | Laiwu     | ss131288413 | 6.80   | 0.414±0.118 | 7.55×10 <sup>-4</sup> | 1  |
| 5 | Scapula | Laiwu     | ss131288413 | 6.80   | 0.388±0.111 | 6.05×10 <sup>-4</sup> | 1  |
| 5 | Tibia   | Meta      | ss131294686 | 87.76  | 0.138±0.040 | 5.35×10 <sup>-4</sup> | 2  |
| 6 | Tibia   | Meta      | ss131308626 | 13.67  | 0.129±0.034 | 1.41×10 <sup>-4</sup> | 2  |
| 6 | Scapula | Erhualian | ss131566460 | 126.22 | 0.505±0.121 | 1.26×10 <sup>-4</sup> | 6  |
| 6 | Scapula | Meta      | ss120025426 | 131.83 | 0.132±0.034 | 1.33×10 <sup>-4</sup> | 3  |
| 6 | Femur   | Meta      | ss107911098 | 135.14 | 0.137±0.036 | 1.22×10 <sup>-4</sup> | 1  |
| 6 | Ulna    | Meta      | ss131045176 | 136.99 | 0.118±0.036 | 9.11×10 <sup>-4</sup> | 1  |
| 6 | Ulna    | Erhualian | ss131117950 | 151.05 | 0.224±0.056 | 2.70×10 <sup>-4</sup> | 1  |
| 7 | Ulna    | Sutai     | ss478941558 | 9.77   | 0.271±0.074 | 3.99×10 <sup>-4</sup> | 2  |
| 7 | Ulna    | Laiwu     | ss131356028 | 59.36  | 0.475±0.130 | 7.40×10 <sup>-4</sup> | 3  |
| 7 | Scapula | Sutai     | ss107839060 | 91.17  | 0.249±0.069 | 5.03×10 <sup>-4</sup> | 2  |
| 7 | Femur   | Laiwu     | ss107823551 | 94.81  | 0.454±0.123 | 7.83×10 <sup>-4</sup> | 1  |
| 8 | Ulna    | Erhualian | ss131567089 | 20.12  | 0.222±0.057 | 4.40×10 <sup>-4</sup> | 1  |
| 8 | Femur   | Meta      | ss120029889 | 23.52  | 0.112±0.032 | 4.88×10 <sup>-4</sup> | 1  |
| 8 | Humerus | Laiwu     | ss478934975 | 82.40  | 0.327±0.090 | 4.96×10 <sup>-4</sup> | 3  |
| 8 | Femur   | Erhualian | ss131056090 | 110.82 | 0.573±0.149 | 3.70×10 <sup>-4</sup> | 8  |
| 8 | Tibia   | Meta      | ss131375845 | 114.38 | 0.108±0.031 | 4.08×10 <sup>-4</sup> | 3  |
| 8 | Tibia   | Erhualian | ss131048831 | 122.66 | 0.341±0.090 | 5.45×10 <sup>-4</sup> | 2  |
| 8 | Scapula | Meta      | ss131377162 | 127.82 | 0.154±0.039 | 7.72×10 <sup>-5</sup> | 3  |
| 8 | Scapula | Erhualian | ss131567419 | 129.88 | 0.273±0.074 | 6.11×10 <sup>-4</sup> | 3  |
| 8 | Scapula | Sutai     | ss131380315 | 141.98 | 0.249±0.059 | 5.01×10 <sup>-5</sup> | 5  |
| 8 | Ulna    | Sutai     | ss107801256 | 142.28 | 0.239±0.067 | 5.70×10 <sup>-4</sup> | 1  |
| 9 | Humerus | Erhualian | ss131414482 | 17.34  | 0.246±0.059 | 8.87×10 <sup>-5</sup> | 1  |
| 9 | Femur   | Meta      | ss131390657 | 47.38  | 0.163±0.044 | 1.85×10 <sup>-4</sup> | 2  |
| 9 | Humerus | Meta      | ss131390657 | 47.38  | 0.160±0.040 | 6.54×10 <sup>-5</sup> | 1  |
| 9 | Scapula | Meta      | ss131395613 | 64.68  | 0.163±0.042 | 9.41×10 <sup>-5</sup> | 16 |

|    |         |           |             |        |             |                       |    |
|----|---------|-----------|-------------|--------|-------------|-----------------------|----|
| 9  | Scapula | Sutai     | ss107811992 | 65.15  | 0.236±0.058 | 9.61×10 <sup>-5</sup> | 16 |
| 9  | Humerus | Laiwu     | ss131036120 | 118.55 | 0.374±0.095 | 1.57×10 <sup>-4</sup> | 2  |
| 9  | Ulna    | Meta      | ss107824562 | 143.33 | 0.129±0.039 | 8.47×10 <sup>-4</sup> | 2  |
| 10 | Ulna    | Meta      | ss131432739 | 8.58   | 0.118±0.032 | 2.54×10 <sup>-4</sup> | 1  |
| 10 | Ulna    | Sutai     | ss107845583 | 11.61  | 0.211±0.060 | 7.55×10 <sup>-4</sup> | 1  |
| 10 | Femur   | Sutai     | ss107845583 | 11.61  | 0.207±0.058 | 5.87×10 <sup>-4</sup> | 1  |
| 10 | Femur   | Meta      | ss107845583 | 11.61  | 0.111±0.033 | 8.01×10 <sup>-4</sup> | 1  |
| 10 | Scapula | Sutai     | ss107799199 | 12.05  | 0.194±0.053 | 3.41×10 <sup>-4</sup> | 1  |
| 10 | Humerus | Meta      | ss107816645 | 56.40  | 0.155±0.046 | 7.28×10 <sup>-4</sup> | 1  |
| 10 | Scapula | Meta      | ss131428094 | 63.71  | 0.133±0.036 | 2.02×10 <sup>-4</sup> | 1  |
| 10 | Tibia   | Meta      | ss131119260 | 67.88  | 0.123±0.032 | 1.14×10 <sup>-4</sup> | 1  |
| 10 | Scapula | Laiwu     | ss120031824 | 68.20  | 0.404±0.114 | 5.08×10 <sup>-4</sup> | 2  |
| 10 | Scapula | Erhualian | ss478939215 | 72.26  | 0.288±0.079 | 8.12×10 <sup>-4</sup> | 1  |
| 11 | Femur   | Meta      | ss131451929 | 80.76  | 0.108±0.032 | 9.05×10 <sup>-4</sup> | 1  |
| 11 | Femur   | Laiwu     | ss131451965 | 80.80  | 0.246±0.066 | 6.36×10 <sup>-4</sup> | 1  |
| 11 | Scapula | Laiwu     | ss131451965 | 80.80  | 0.288±0.069 | 4.17×10 <sup>-5</sup> | 3  |
| 11 | Humerus | Laiwu     | ss131452227 | 81.16  | 0.290±0.084 | 8.43×10 <sup>-4</sup> | 1  |
| 11 | Tibia   | Meta      | ss131453457 | 83.47  | 0.106±0.030 | 4.87×10 <sup>-4</sup> | 2  |
| 12 | Femur   | Meta      | ss131475589 | 2.52   | 0.118±0.030 | 1.13×10 <sup>-4</sup> | 8  |
| 12 | Tibia   | Meta      | ss131475589 | 2.52   | 0.098±0.028 | 5.96×10 <sup>-4</sup> | 1  |
| 12 | Scapula | Meta      | ss131476871 | 2.88   | 0.106±0.031 | 7.93×10 <sup>-4</sup> | 1  |
| 12 | Femur   | Sutai     | ss131568357 | 2.98   | 0.177±0.050 | 6.65×10 <sup>-4</sup> | 1  |
| 12 | Tibia   | Sutai     | ss131568357 | 2.98   | 0.177±0.051 | 9.00×10 <sup>-4</sup> | 1  |
| 12 | Tibia   | Laiwu     | ss131568432 | 25.58  | 0.352±0.086 | 2.28×10 <sup>-4</sup> | 2  |
| 12 | Ulna    | Meta      | ss478937246 | 32.01  | 0.133±0.035 | 1.29×10 <sup>-4</sup> | 3  |
| 12 | Scapula | Sutai     | ss131063005 | 34     | 0.240±0.066 | 4.39×10 <sup>-4</sup> | 3  |
| 12 | Humerus | Meta      | ss131063005 | 34.00  | 0.102±0.029 | 4.57×10 <sup>-4</sup> | 3  |
| 12 | Humerus | Sutai     | ss131035905 | 42.38  | 0.201±0.052 | 1.59×10 <sup>-4</sup> | 3  |
| 12 | Ulna    | Laiwu     | ss107812785 | 58.95  | 0.272±0.066 | 1.41×10 <sup>-4</sup> | 3  |

|    |         |           |             |        |             |                       |    |
|----|---------|-----------|-------------|--------|-------------|-----------------------|----|
| 13 | Humerus | Sutai     | ss131480187 | 17.49  | 0.190±0.051 | 2.85×10 <sup>-4</sup> | 2  |
| 13 | Tibia   | Laiwu     | ss131488021 | 38.87  | 0.360±0.091 | 3.79×10 <sup>-4</sup> | 1  |
| 13 | Humerus | Meta      | ss131488171 | 40.28  | 0.127±0.032 | 8.63×10 <sup>-5</sup> | 8  |
| 13 | Femur   | Sutai     | ss131488521 | 45.20  | 0.317±0.089 | 6.38×10 <sup>-4</sup> | 3  |
| 13 | Femur   | Meta      | ss107816469 | 59.17  | 0.133±0.038 | 4.63×10 <sup>-4</sup> | 2  |
| 13 | Ulna    | Sutai     | ss131477405 | 185.61 | 0.254±0.069 | 3.74×10 <sup>-4</sup> | 1  |
| 13 | Ulna    | Erhualian | ss131477463 | 185.84 | 0.232±0.063 | 8.12×10 <sup>-4</sup> | 1  |
| 13 | Ulna    | Meta      | ss120025165 | 199.55 | 0.151±0.039 | 9.03×10 <sup>-5</sup> | 4  |
| 13 | Scapula | Laiwu     | ss131480458 | 203.12 | 0.415±0.118 | 6.05×10 <sup>-4</sup> | 2  |
| 13 | Scapula | Erhualian | ss478937383 | 213.34 | 0.256±0.069 | 6.03×10 <sup>-4</sup> | 2  |
| 14 | Ulna    | Sutai     | ss131508262 | 18.18  | 0.264±0.069 | 2.34×10 <sup>-4</sup> | 3  |
| 14 | Humerus | Sutai     | ss131511298 | 37.25  | 0.267±0.075 | 5.48×10 <sup>-4</sup> | 2  |
| 14 | Scapula | Erhualian | ss107864658 | 48.54  | 0.372±0.101 | 7.04×10 <sup>-4</sup> | 3  |
| 14 | Tibia   | Sutai     | ss120028609 | 56.27  | 0.278±0.077 | 4.99×10 <sup>-4</sup> | 6  |
| 14 | Femur   | Sutai     | ss131515687 | 64.87  | 0.239±0.060 | 1.27×10 <sup>-4</sup> | 15 |
| 14 | Ulna    | Laiwu     | ss107874852 | 152.52 | 0.271±0.073 | 6.05×10 <sup>-4</sup> | 2  |
| 14 | Humerus | Laiwu     | ss107874852 | 152.52 | 0.267±0.074 | 5.02×10 <sup>-4</sup> | 3  |
| 15 | Scapula | Sutai     | ss131522154 | 4.50   | 0.325±0.087 | 2.80×10 <sup>-4</sup> | 4  |
| 15 | Ulna    | Meta      | ss131525838 | 11.30  | 0.109±0.032 | 7.01×10 <sup>-4</sup> | 1  |
| 15 | Tibia   | Sutai     | ss131521797 | 19.49  | 0.245±0.071 | 9.11×10 <sup>-4</sup> | 2  |
| 15 | Humerus | Meta      | ss107880152 | 21.18  | 0.172±0.049 | 4.71×10 <sup>-4</sup> | 2  |
| 15 | Femur   | Meta      | ss131081142 | 35.57  | 0.119±0.035 | 6.99×10 <sup>-4</sup> | 3  |
| 15 | Femur   | Sutai     | ss131523849 | 40.78  | 0.314±0.092 | 9.95×10 <sup>-4</sup> | 2  |
| 15 | Humerus | Sutai     | ss478944261 | 45.84  | 0.367±0.087 | 4.43×10 <sup>-5</sup> | 2  |
| 15 | Ulna    | Sutai     | ss107859991 | 72.94  | 0.354±0.100 | 6.93×10 <sup>-4</sup> | 1  |
| 15 | Ulna    | Laiwu     | ss131529477 | 137.70 | 0.282±0.079 | 9.47×10 <sup>-4</sup> | 1  |
| 15 | Scapula | Meta      | ss131569463 | 150.37 | 0.127±0.036 | 4.51×10 <sup>-4</sup> | 4  |
| 16 | Scapula | Laiwu     | ss131539813 | 9.66   | 0.472±0.131 | 4.01×10 <sup>-4</sup> | 1  |
| 16 | Femur   | Laiwu     | ss131542184 | 17.47  | 0.384±0.098 | 3.40×10 <sup>-4</sup> | 2  |

|    |         |           |             |        |             |                       |    |
|----|---------|-----------|-------------|--------|-------------|-----------------------|----|
| 16 | Humerus | Laiwu     | ss131542184 | 17.47  | 0.393±0.105 | 3.26×10 <sup>-4</sup> | 4  |
| 16 | Ulna    | Laiwu     | ss131041188 | 20.97  | 0.395±0.106 | 5.65×10 <sup>-4</sup> | 5  |
| 16 | Femur   | Meta      | ss107846705 | 24.77  | 0.119±0.034 | 4.71×10 <sup>-4</sup> | 4  |
| 16 | Ulna    | Meta      | ss131535731 | 44.51  | 0.148±0.041 | 2.54×10 <sup>-4</sup> | 5  |
| 16 | Scapula | Meta      | ss131540384 | 81.62  | 0.124±0.035 | 4.88×10 <sup>-4</sup> | 3  |
| 16 | Scapula | Sutai     | ss131541031 | 82.84  | 0.204±0.059 | 8.74×10 <sup>-4</sup> | 1  |
| 16 | Humerus | Meta      | ss131103922 | 84.38  | 0.121±0.030 | 6.97×10 <sup>-5</sup> | 6  |
| 17 | Humerus | Meta      | ss131064820 | 3.751  | 0.129±0.033 | 9.01×10 <sup>-5</sup> | 4  |
| 17 | Humerus | Laiwu     | ss131550383 | 6.35   | 0.264±0.073 | 5.05×10 <sup>-4</sup> | 1  |
| 17 | Tibia   | Sutai     | ss120019525 | 9.40   | 0.322±0.079 | 9.71×10 <sup>-5</sup> | 9  |
| 17 | Tibia   | Meta      | ss131542879 | 13.83  | 0.125±0.032 | 1.09×10 <sup>-4</sup> | 8  |
| 17 | Femur   | Laiwu     | ss131543061 | 16.49  | 0.295±0.076 | 4.21×10 <sup>-4</sup> | 1  |
| 17 | Tibia   | Laiwu     | ss131543061 | 16.49  | 0.267±0.070 | 5.16×10 <sup>-4</sup> | 1  |
| 17 | Humerus | Sutai     | ss107853195 | 17.42  | 0.262±0.064 | 7.93×10 <sup>-5</sup> | 2  |
| 17 | Femur   | Sutai     | ss107823760 | 22.50  | 0.237±0.056 | 4.10×10 <sup>-5</sup> | 10 |
| 17 | Scapula | Meta      | ss107823760 | 22.50  | 0.146±0.039 | 1.82×10 <sup>-4</sup> | 2  |
| 18 | Scapula | Meta      | ss107867988 | 14.93  | 0.118±0.036 | 9.49×10 <sup>-4</sup> | 1  |
| 18 | Scapula | Laiwu     | ss131555889 | 36.26  | 0.336±0.084 | 9.10×10 <sup>-5</sup> | 4  |
| 18 | Ulna    | Meta      | ss107835048 | 52.79  | 0.117±0.034 | 5.69×10 <sup>-4</sup> | 2  |
| 18 | Humerus | Meta      | ss131558380 | 55.27  | 0.112±0.031 | 2.53×10 <sup>-4</sup> | 1  |
| X  | Tibia   | Sutai     | ss131561906 | 56.72  | 0.135±0.037 | 5.29×10 <sup>-4</sup> | 33 |
| X  | Tibia   | Erhualian | ss478935724 | 102.94 | 0.186±0.041 | 3.82×10 <sup>-5</sup> | 1  |

Notes: 1. Chromosome; 2. The *P* value was corrected by genomic control. \*\*: 1% genome-wide significant; \*: 5% genome-wide significant; without \*: suggestive significant; 3. number of SNPs that surpass the suggestive significance level.
