# Supplementary material for: A meta analysis of genome-wide association studies for limb bone lengths in four pig populations
Source: PubMed Central journal article supplement (PMC4518597; doi:10.1186/s12863-015-0257-1), 2015-07-29
Supplement: 12863_2015_257_MOESM11_ESM.pdf [file 12863_2015_257_MOESM11_ESM.pdf]

**a**

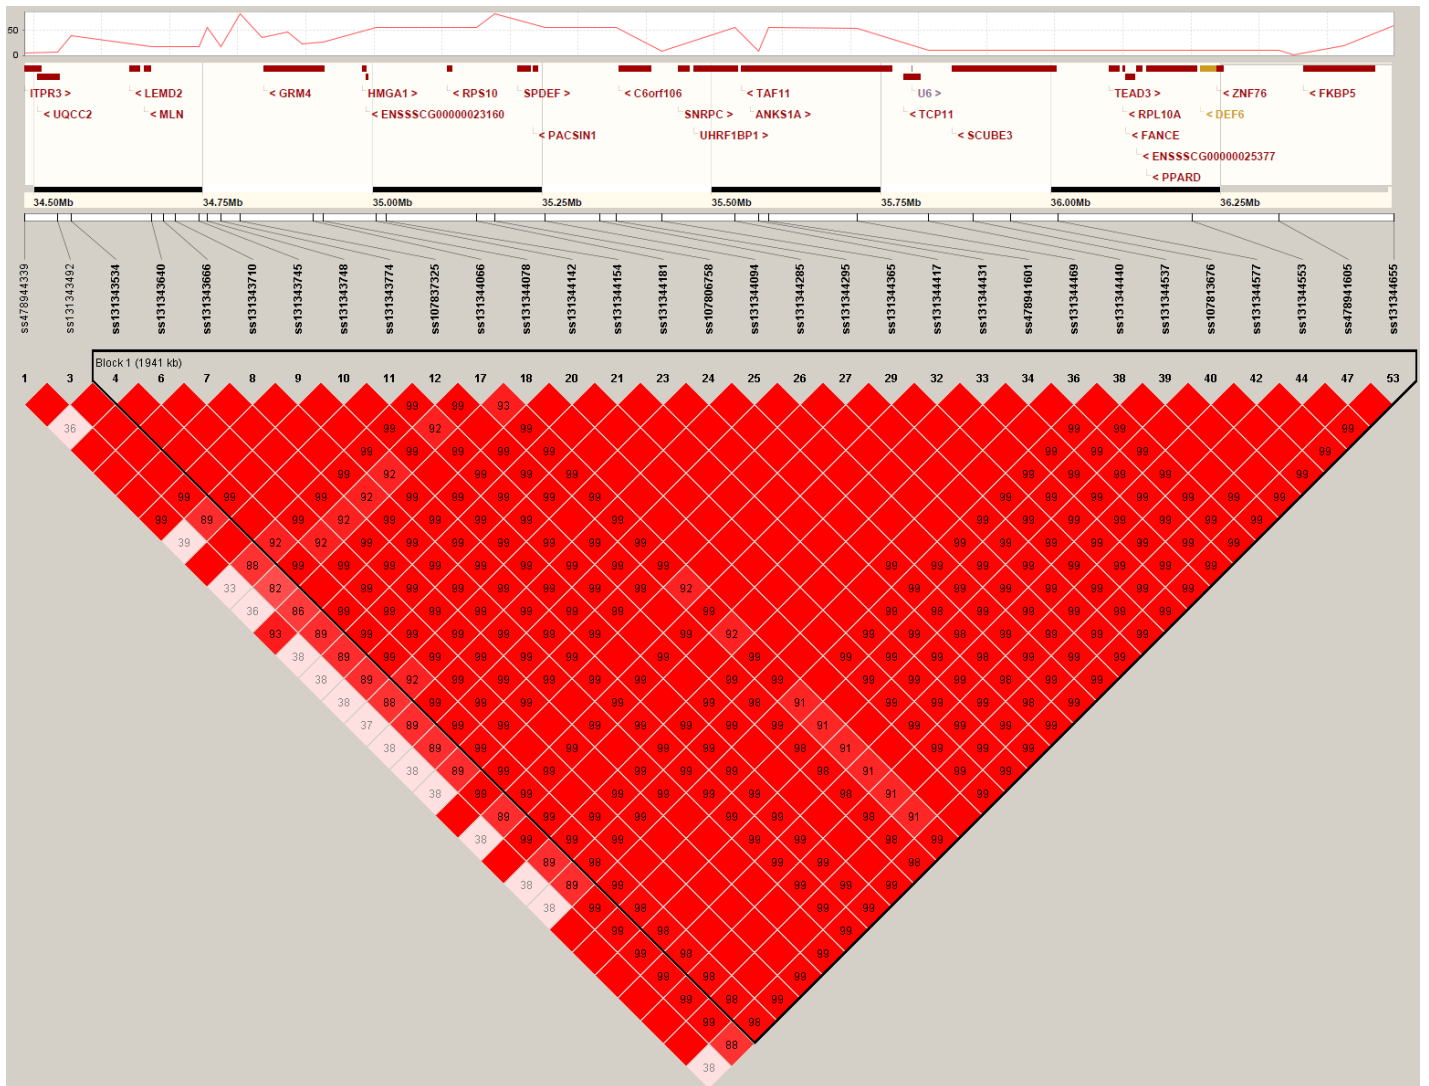

**b**

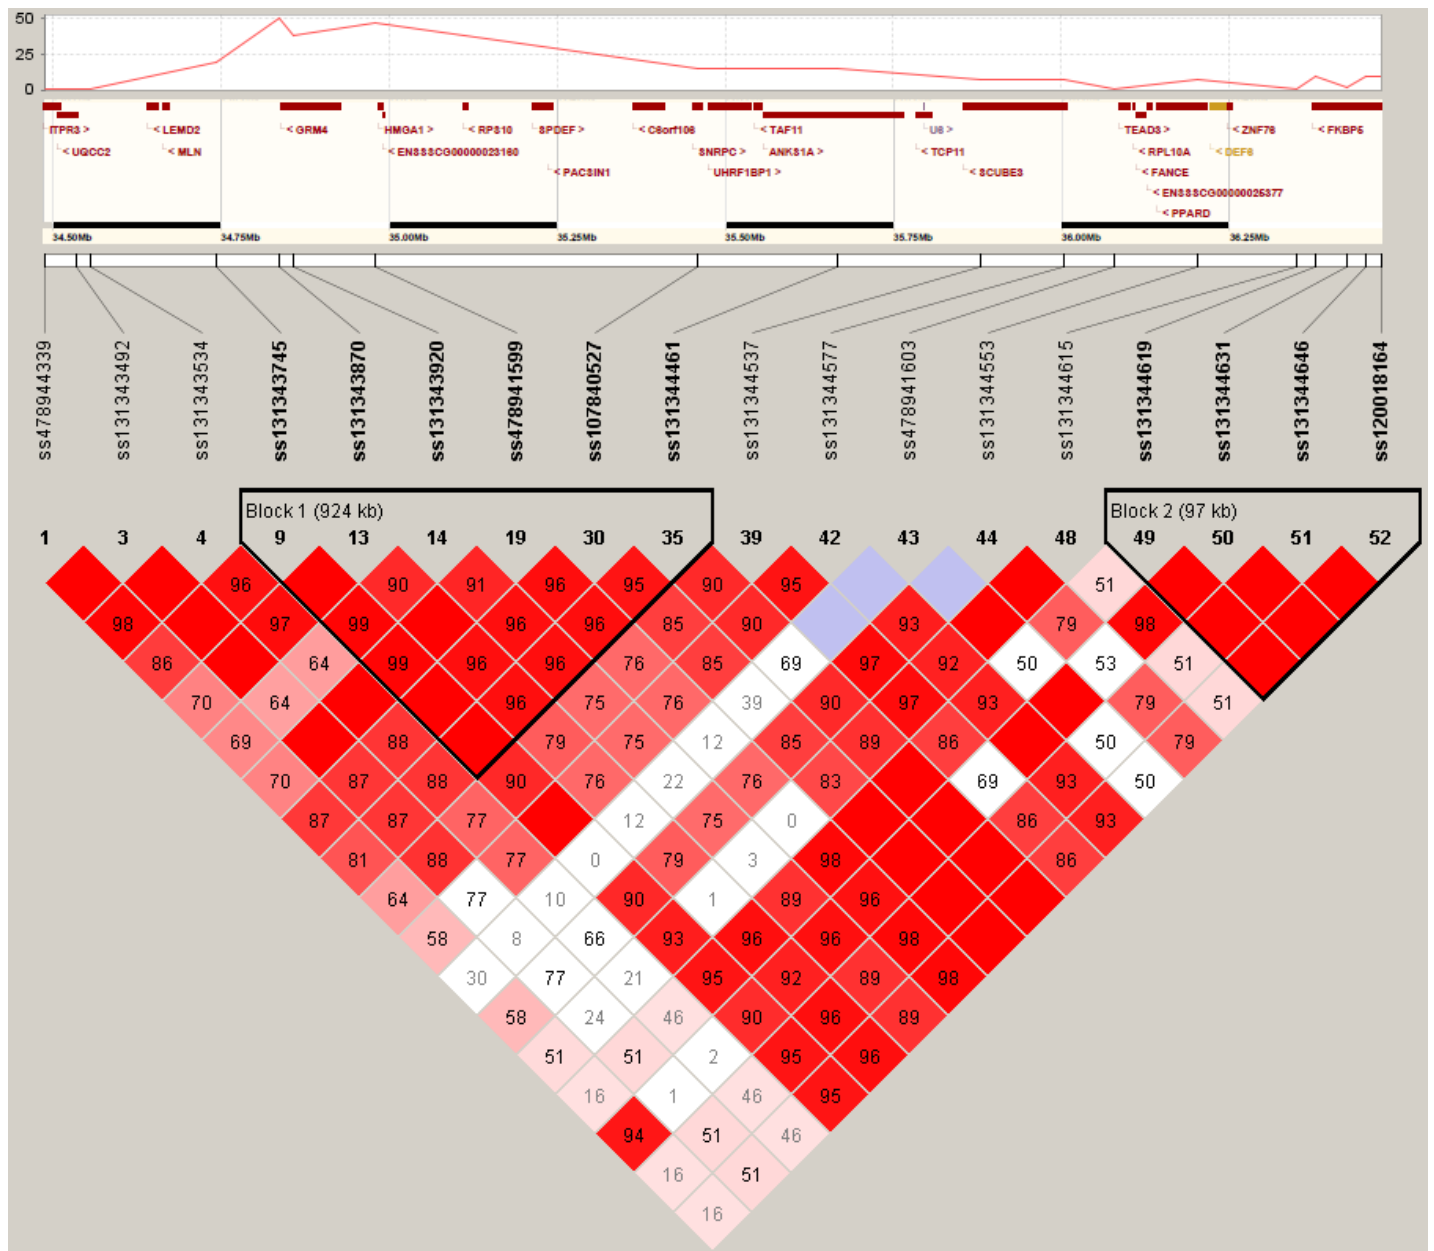



d

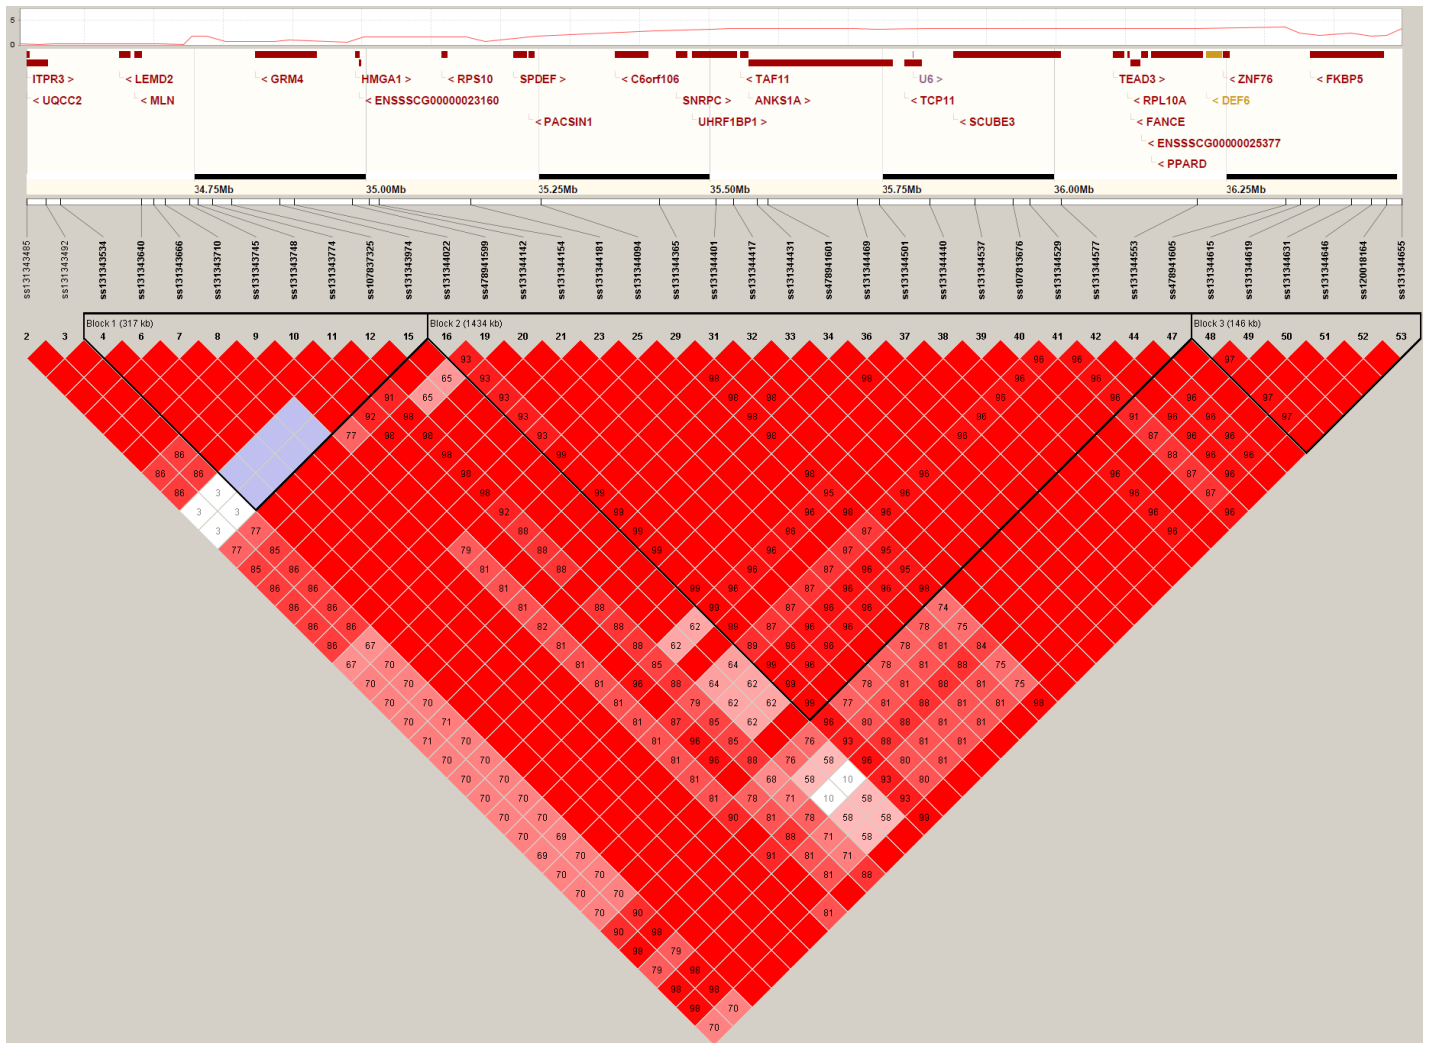

e

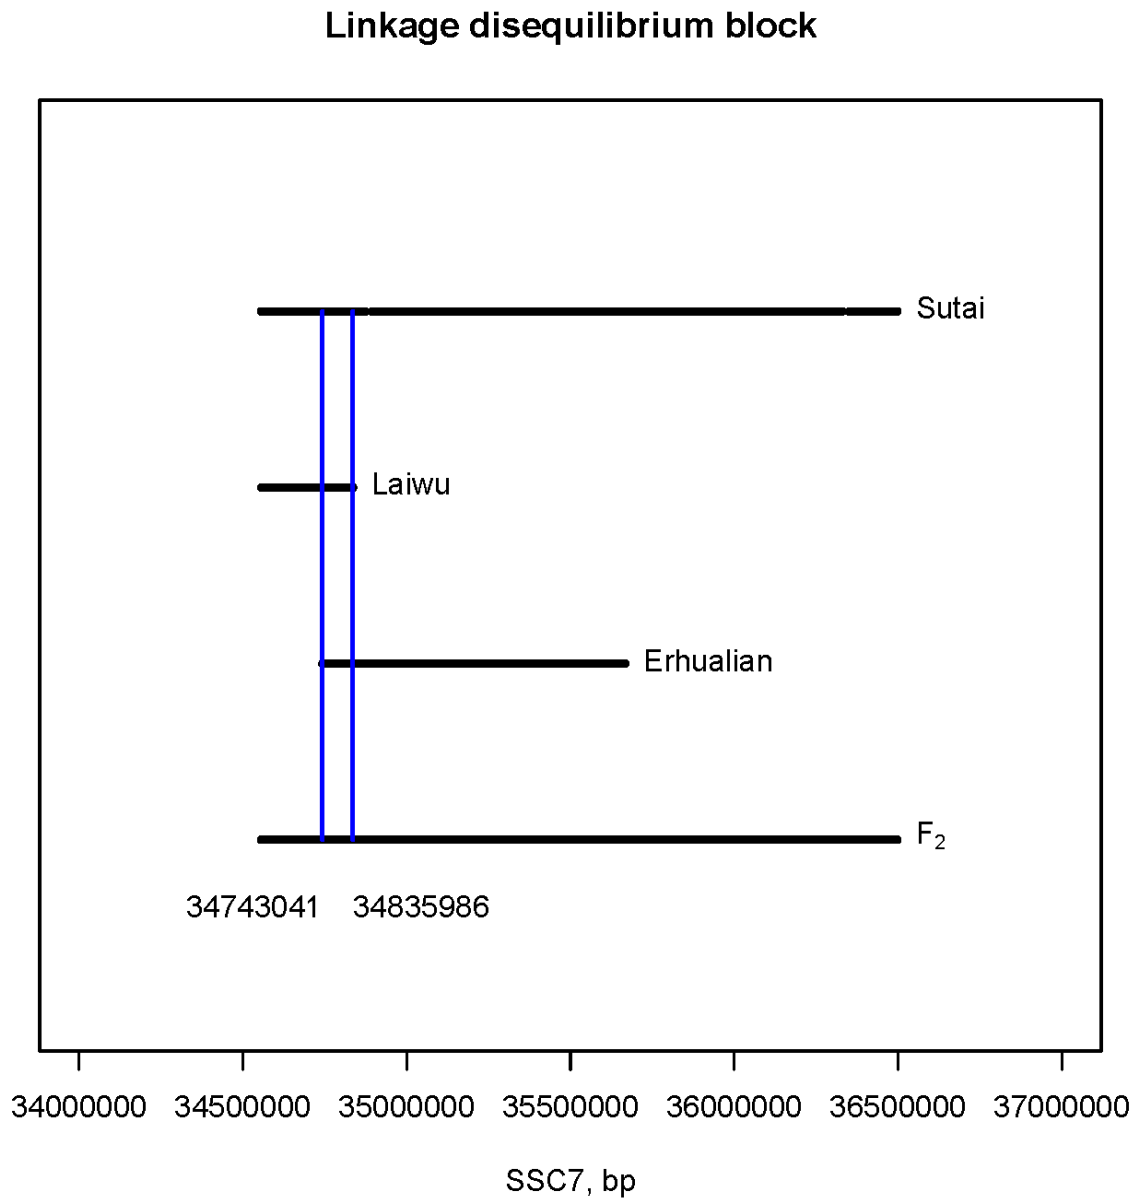

**Additional File 11** The linkage disequilibrium (LD) block in the significant genomic region on SSC7. a. F<sub>2</sub>; b. Erhualian; c. Laiwu; d. Sutai; e. LD block sharing among populations. Top: The curve of the negative log<sub>10</sub> meta *P* value of the limb bone lengths; Middle: Annotated genes in the chromosomal region retrieved from the Ensemble genome browser; Bottom: LD block.
