# Supplementary material for: A meta analysis of genome-wide association studies for limb bone lengths in four pig populations
Source: PubMed Central journal article supplement (PMC4518597; doi:10.1186/s12863-015-0257-1), 2015-07-29
Supplement: 12863_2015_257_MOESM12_ESM.pdf [file 12863_2015_257_MOESM12_ESM.pdf]

**Additional File 12** The tight linkage of the unassigned significant SNP with the mapped SNP

| Unmapped SNP | Population     | Associated trait                     | Tightly linked SNP |            |              | Recombination | LOD    |
|--------------|----------------|--------------------------------------|--------------------|------------|--------------|---------------|--------|
|              |                |                                      | Name               | Chromosome | Position, bp |               |        |
| ss131338262  | F <sub>2</sub> | Scapula, Humerus, Tibia              | ss131337985        | 7          | 21535371     | 0.0054        | 391.40 |
| ss131338295  | F <sub>2</sub> | Scapula, Humerus, Tibia              | ss131337985        | 7          | 21535371     | 0.0054        | 391.40 |
| ss131345835  | Meta           | Humerus, Ulna, Tibia                 | ss131344469        | 7          | 35709335     | 0.0060        | 195.07 |
| ss131348218  | F <sub>2</sub> | Scapula, Ulna, Femur, Tibia          | ss131348350        | 7          | 43205140     | 0.0049        | 389.81 |
| ss131101988  | F <sub>2</sub> | Scapula, Humerus, Ulna, Femur, Tibia | ss131342502        | 7          | 32997273     | 0.0016        | 404.24 |
| ss131079954  | F <sub>2</sub> | Femur                                | ss131342502        | 7          | 32997273     | 0.0000        | 108.07 |
| ss131158626  | Meta           | Femur                                | ss478937395        | 1          | 303886984    | 0.0000        | 119.21 |
| ss131265188  | Erhualian      | Scapula                              | ss131265212        | 4          | 66284214     | 0.0024        | 301.78 |
| ss131344757  | F <sub>2</sub> | Scapula, Humerus, Ulna, Femur, Tibia | ss131344469        | 7          | 35709335     | 0.0024        | 288.53 |
| ss131347664  | F <sub>2</sub> | Scapula, Humerus, Ulna, Femur, Tibia | ss131347648        | 7          | 41624144     | 0.0021        | 323.89 |

---

|             |                |                                      |             |    |          |        |        |
|-------------|----------------|--------------------------------------|-------------|----|----------|--------|--------|
| ss478936101 | F <sub>2</sub> | Scapula, Humerus, Ulna, Femur, Tibia | ss131344469 | 7  | 35709335 | 0.0000 | 106.26 |
| ss120019105 | F <sub>2</sub> | Scapula, Humerus, Ulna, Femur, Tibia | ss131344469 | 7  | 35709335 | 0.0000 | 113.49 |
| ss478940923 | Erhualian      | Scapula                              | ss131265212 | 4  | 66284214 | 0.0000 | 136.07 |
| ss478940923 | Meta           | Scapula                              | ss131265212 | 4  | 66284214 | 0.0000 | 136.07 |
| ss131342382 | F <sub>2</sub> | Scapula, Humerus, Ulna, Femur, Tibia | ss131342502 | 7  | 32997273 | 0.0016 | 404.84 |
| ss107902755 | F <sub>2</sub> | Scapula, Humerus, Tibia              | ss107842725 | 7  | 24777963 | 0.0056 | 208.15 |
| ss107879050 | F <sub>2</sub> | Scapula, Humerus, Ulna, Femur, Tibia | ss131342502 | 7  | 32997273 | 0.0016 | 404.24 |
| ss107830715 | Meta           | Tibia                                | ss107865741 | 17 | 15101576 | 0.0000 | 95.73  |
| ss107860263 | Meta           | Humerus, Ulna, Femur, Tibia          | ss131344469 | 7  | 35709335 | 0.0022 | 213.89 |
| ss107855265 | F <sub>2</sub> | Scapula, Humerus, Tibia              | ss107842725 | 7  | 24777963 | 0.0056 | 208.15 |

---
